# Supplementary material for: Characterization of inflammatory breast cancer: a vibrational microspectroscopy and imaging approach at the cellular and tissue level
Source: Royal Society of Chemistry journal article supplement (doi:10.1039/c8an01292j), 2018-01-01
Supplement: c8an01292j1.pdf [file c8an01292j1.pdf]

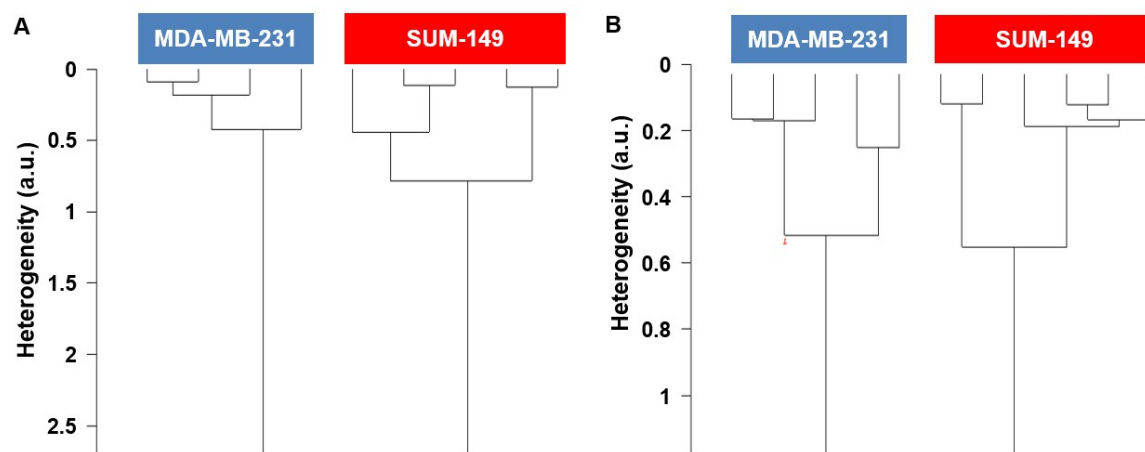

**ESI1:** HCA of MDA-MB-231 and SUM-149 analysis of second derivative FTIR spectra in the spectral range 1800-800  $\text{cm}^{-1}$ . Dendrogram of the two cell lines grown in (A) DMEM medium and (B) HAM's F12 medium.
