# Supplementary material for: Characterization of inflammatory breast cancer: a vibrational microspectroscopy and imaging approach at the cellular and tissue level
Source: Royal Society of Chemistry journal article supplement (doi:10.1039/c8an01292j), 2018-01-01
Supplement: c8an01292j2.pdf [file c8an01292j2.pdf]

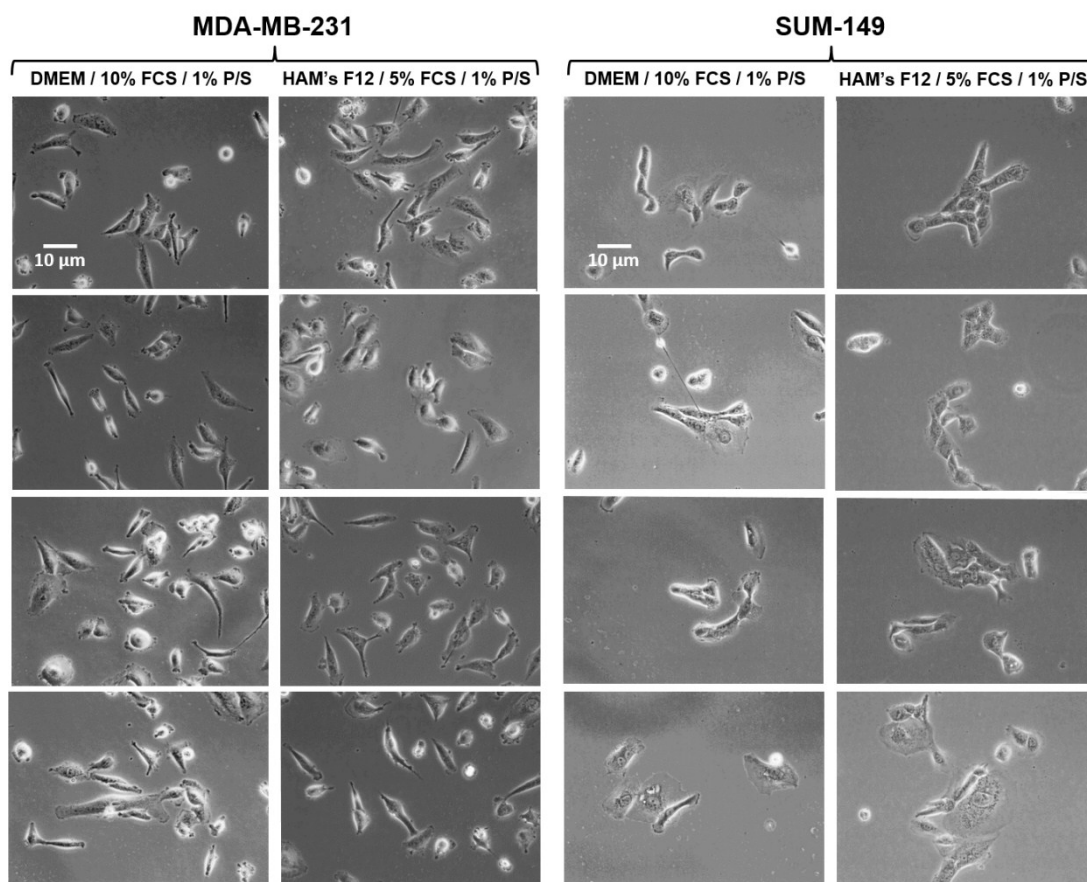

**ESI2:** Morphology of MDA-MB-231 and SUM-149 breast cancer cells. MDA-MB-231 and SUM-149 cell morphology was observed by phase-contrast microscopy. MDA-MB-231 cells exhibit a typical mesenchymal, spindle-like morphology. In contrast, SUM-149 cell morphology is more heterogeneous with both elongated and rounded shapes. These morphologies remained consistent independently of the growth medium. Four representative fields of view are shown for each culture condition.
