# Supplementary material for: Characterization of inflammatory breast cancer: a vibrational microspectroscopy and imaging approach at the cellular and tissue level
Source: Royal Society of Chemistry journal article supplement (doi:10.1039/c8an01292j), 2018-01-01
Supplement: c8an01292j3.pdf [file c8an01292j3.pdf]

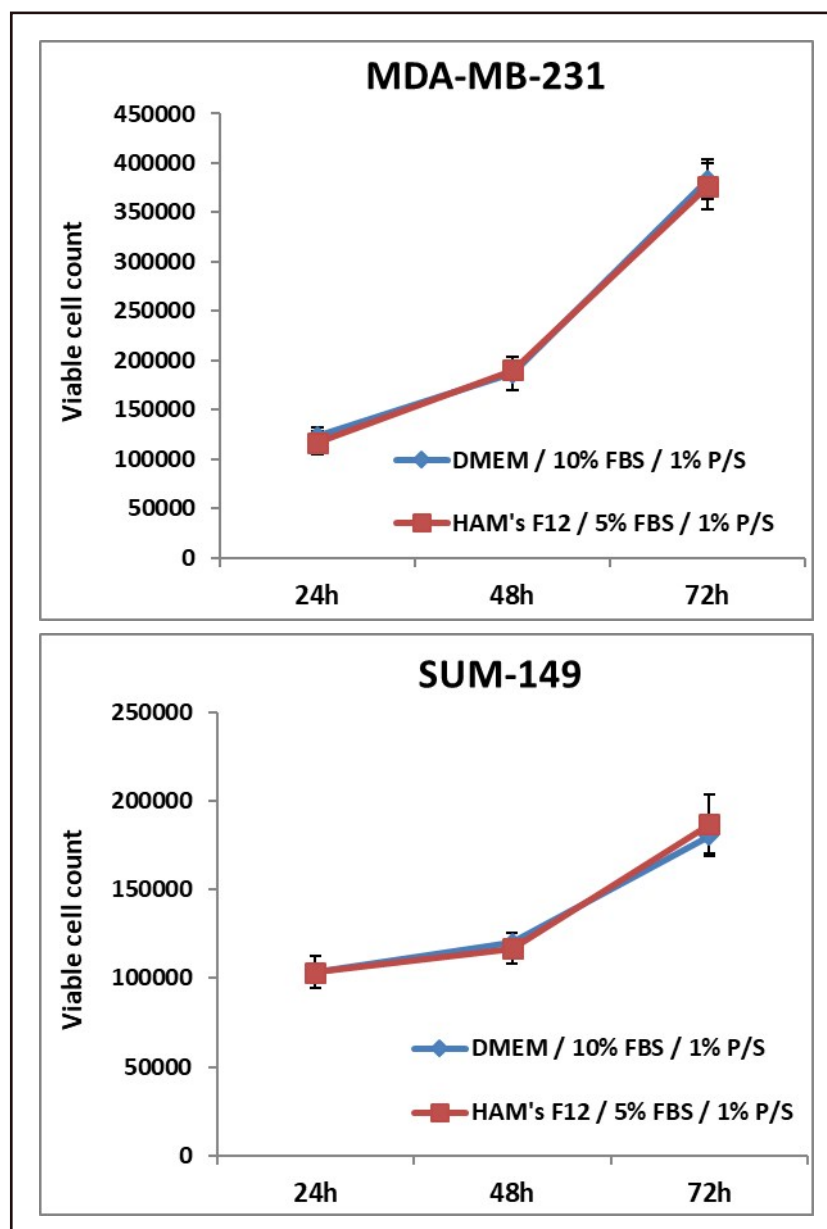

**ESI3:** Cell growth assay. MDA-MB-231 and SUM-149 breast cancer cells were grown for 24, 48 and 72h. For comparison, each cell line was grown in the two media (DMEM and HAM's F12). Cell growth was measured by trypan blue exclusion assay. Results are reported as mean  $\pm$  SD of sextuplicate values.
